# Supplementary material
Source: PubMed Central journal article supplement (PMC7029677)

# Supplementary Figure 1

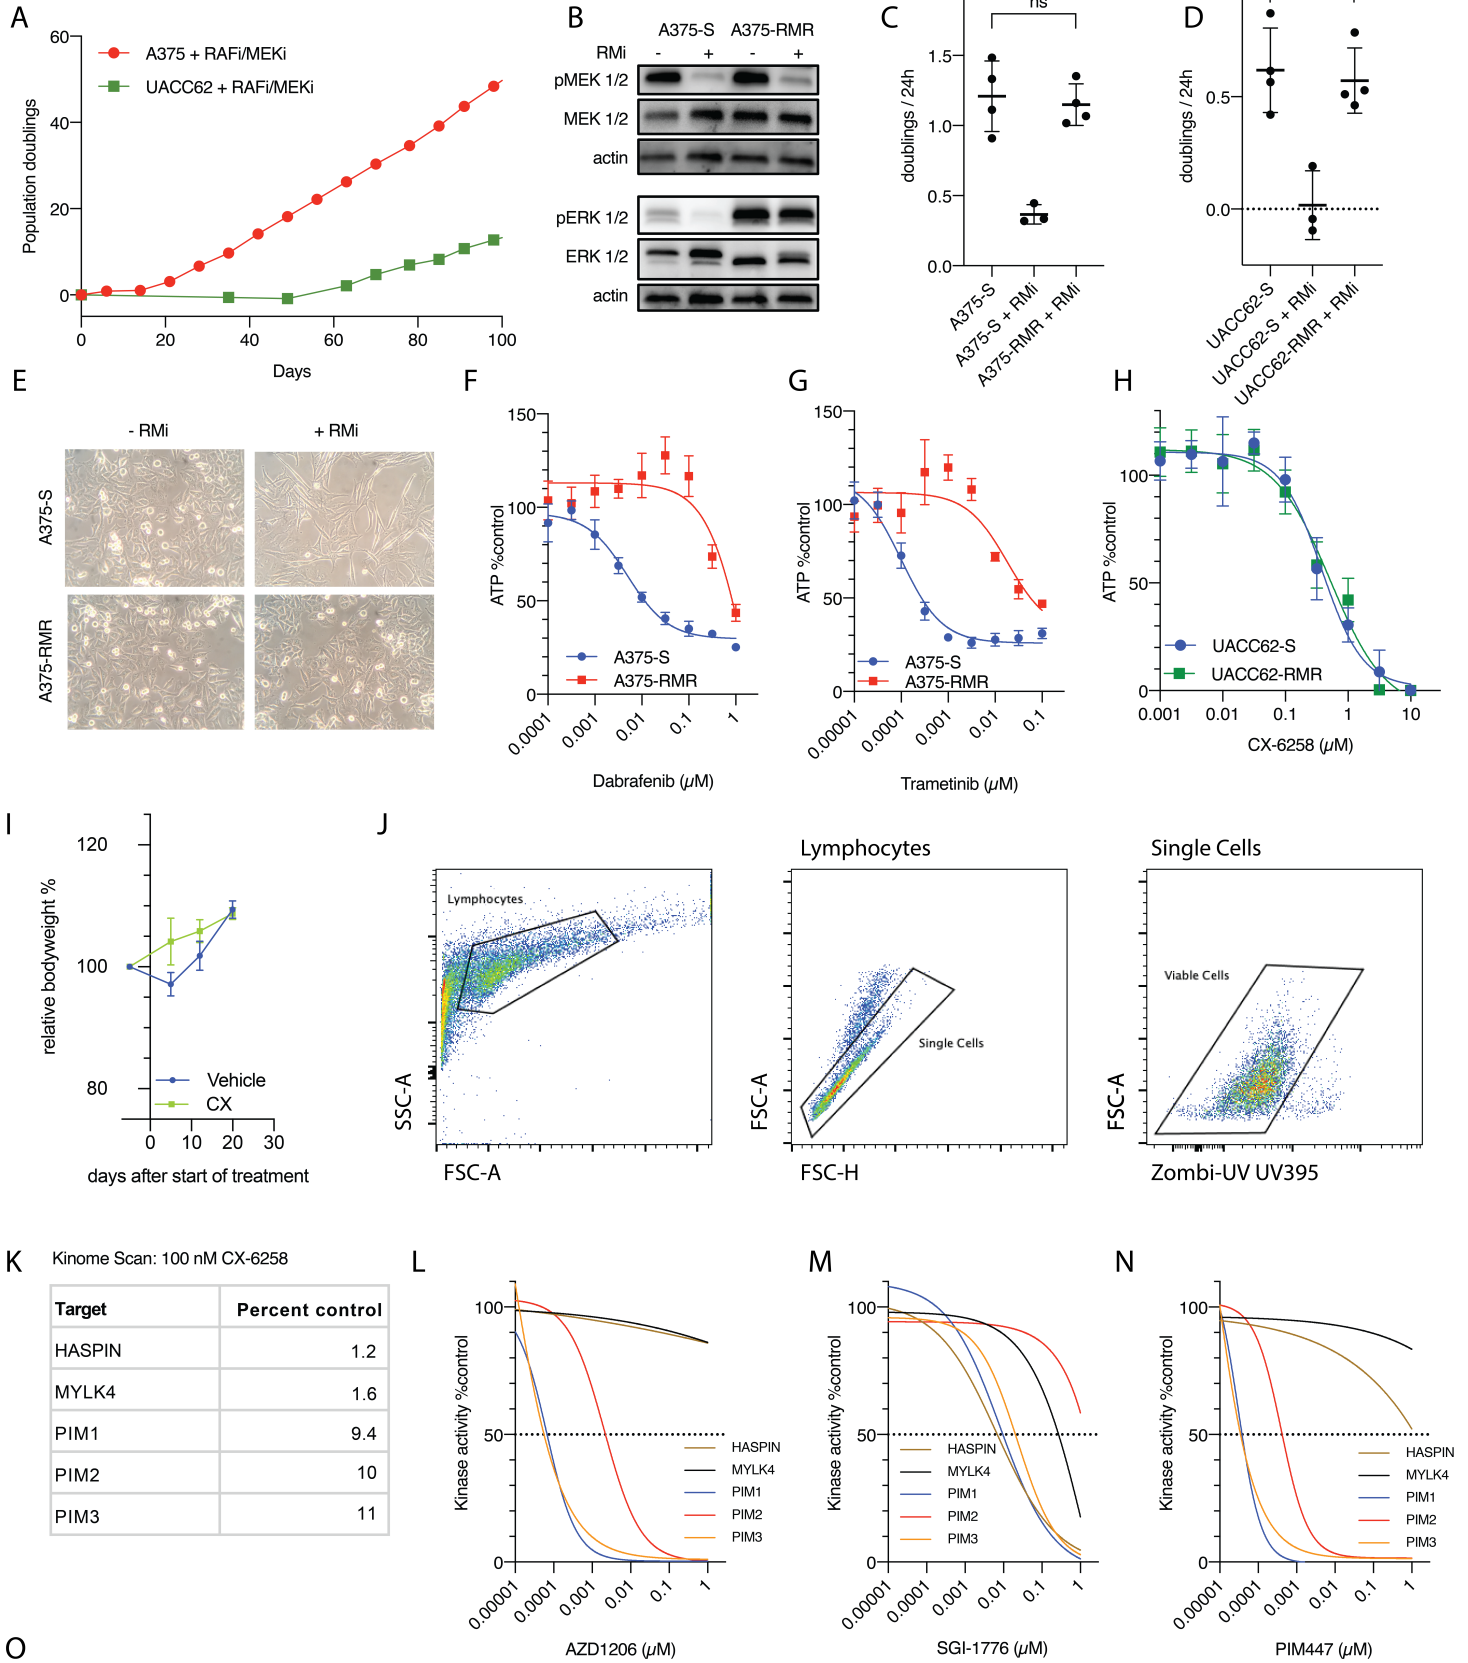

**O**  
pIC<sub>50</sub>

| Target | AZD1206 | CX6258 | PIM447 | SGI1776 |
|--------|---------|--------|--------|---------|
| Haspin | -       | 7.83   | >6     | 8.07    |
| MYLK4  | -       | 8.93   | -      | 6.57    |
| PIM1   | 9.9     | 8.85   | 10.21  | 7.96    |
| PIM2   | 8.56    | 7.19   | 9.22   |         |
| PIM3   | 10.14   | 9.7    | 10.29  | 7.57    |

Supplementary Figure 2

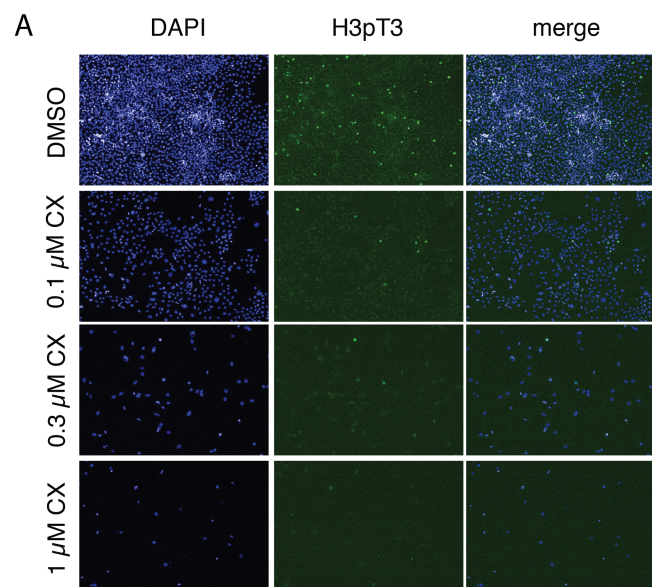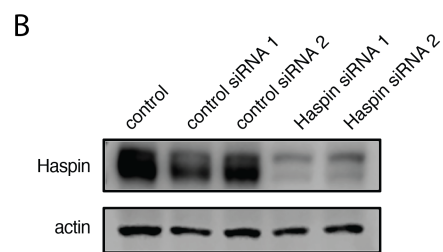

### Supplementary Figure 3

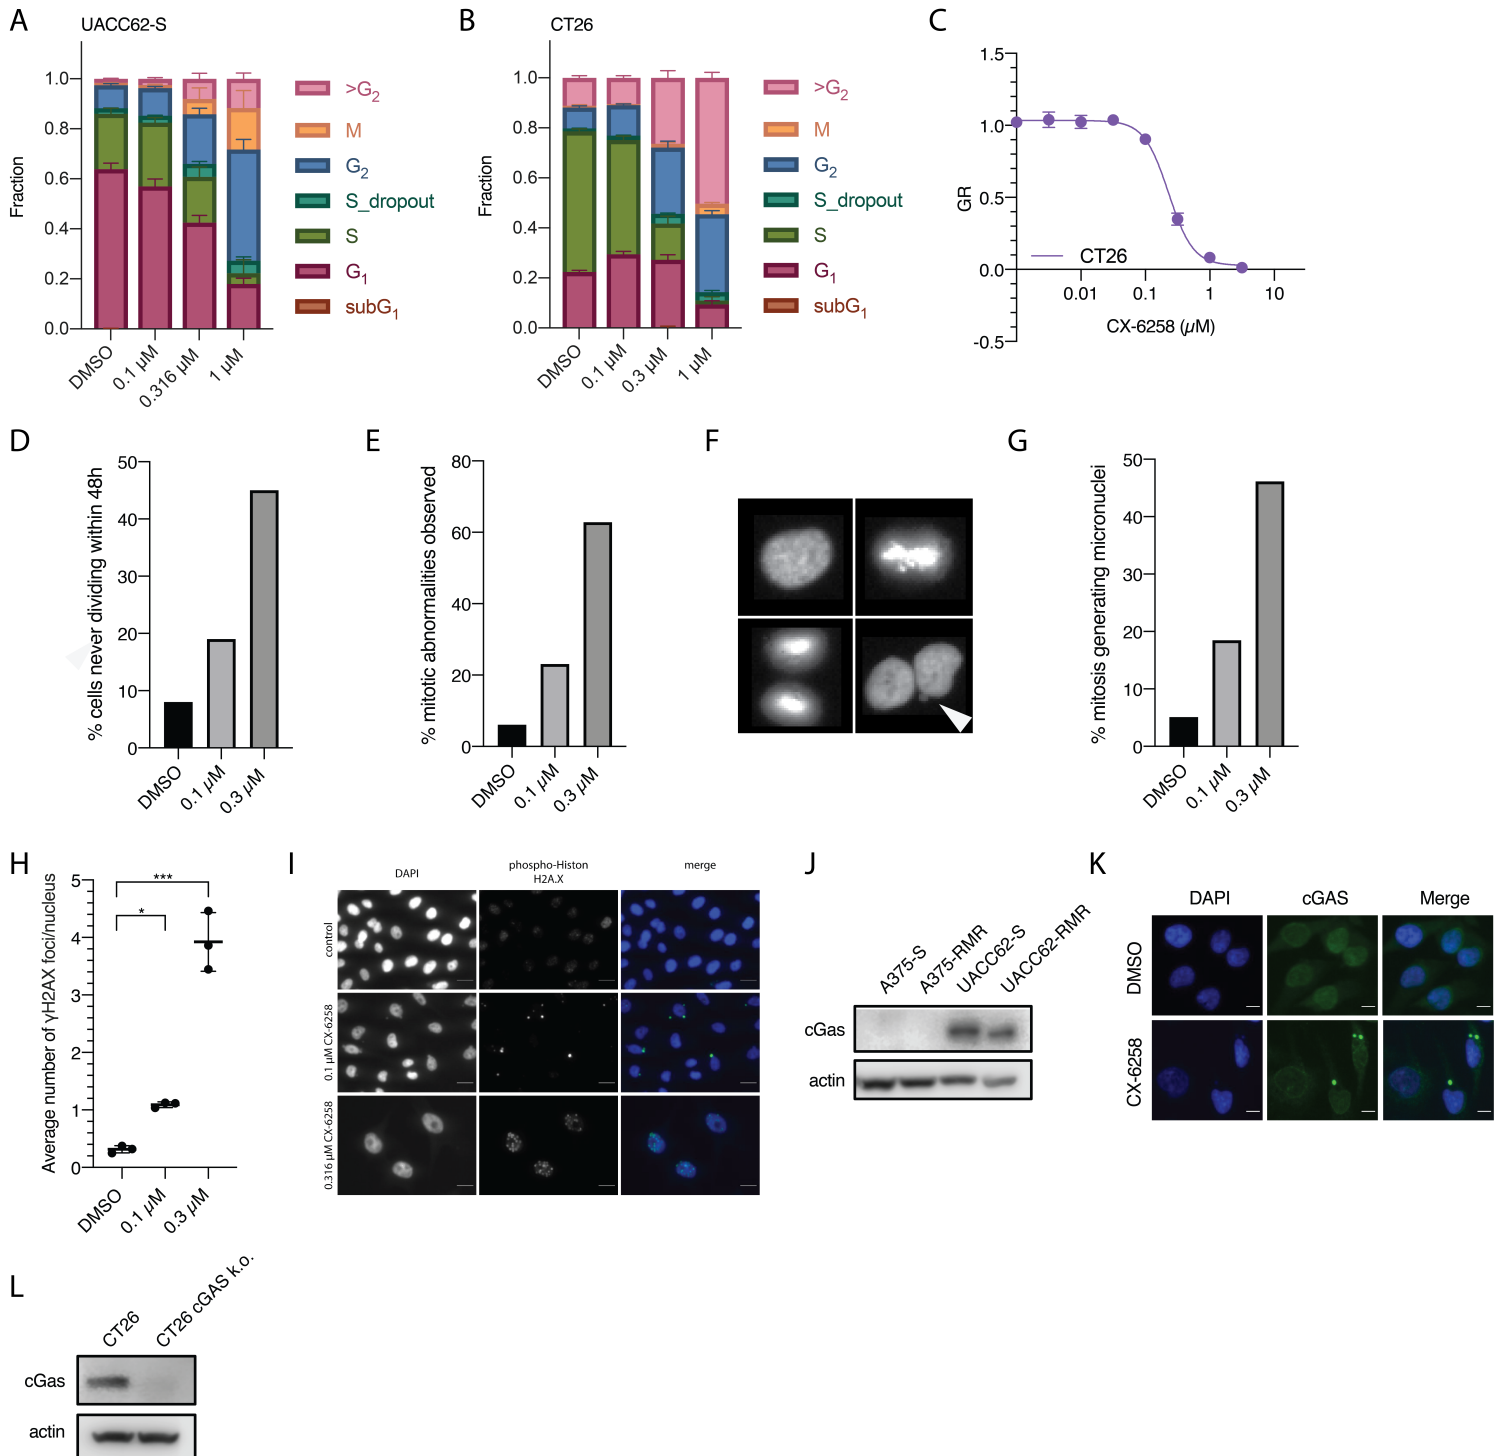

### Supplementary Figure 4

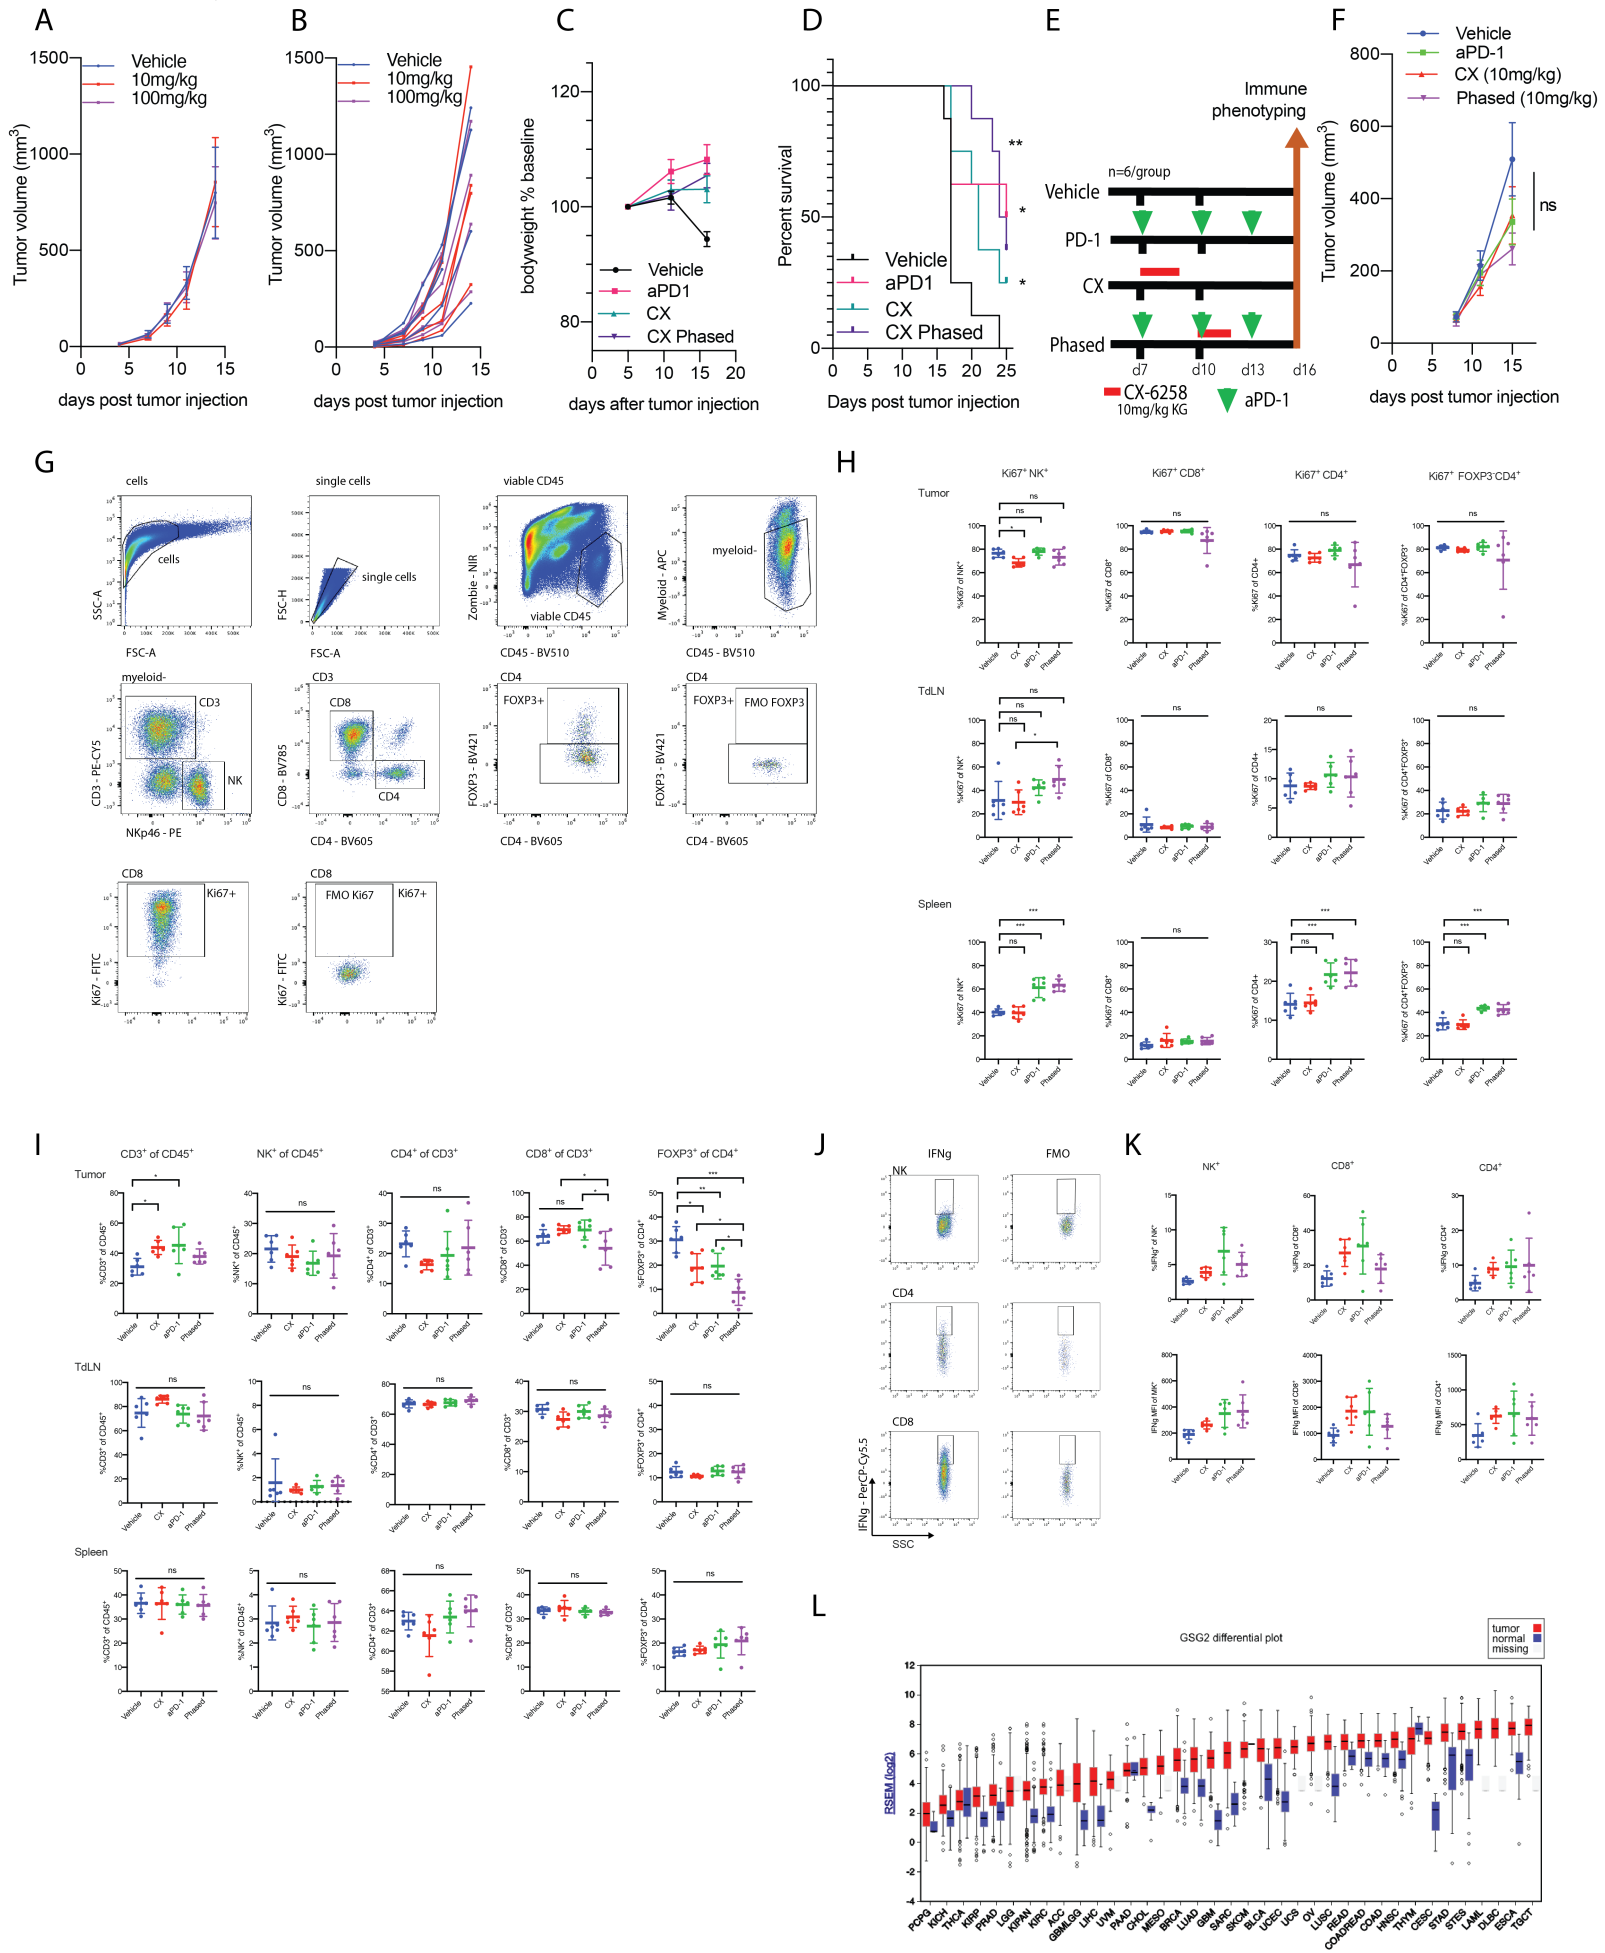

Supplement: NIHMS1547612-supplement-1.pdf [file NIHMS1547612-supplement-1.pdf]
